# Supplementary material
Source: ML conference proceedings conference paper supplement (https://openaccess.thecvf.com/content/CVPR2023/html/Yi_Generating_Holistic_3D_CVPR_2023_paper.html)
Supplement: Supplementary file 3 [file Yi_Generating_Holistic_3D_CVPR_2023_supplemental.zip]

Archive with 4 entries (4 files):
- TalkSHOW_sup_mat.pdf
- __MACOSX/._TalkSHOW_sup_mat.pdf
- TalkSHOW_demo.mp4
- __MACOSX/._TalkSHOW_demo.mp4
